1 **Full Title: Using Simulation-Based Experiential Learning to Increase Students' Ability to**  
2 **Analyze Increasingly Complex Global Health Challenges: A Mixed Methods Study**

3 Ahmad Firas Khalid<sup>1,2</sup>, Megan A. George<sup>2,4</sup>, Clarissa Eggen<sup>2</sup>, Aaranee Sritharan<sup>2</sup>, Faiza Wali<sup>2</sup>,  
4 A. M. Viens<sup>1,3</sup>

5 **Short Title:** Enhancing Analysis of Global Health Challenges via Simulation Learning

6

7 **Affiliations**

8 1. School of Global Health, York University, Toronto, Ontario, Canada

9 2. Dahdaleh Institute for Global Health Research, York University, Toronto, Ontario, Canada

10 3. Global Health Strategy Lab, York University, Toronto, Ontario, Canada

11 4. Faculty of Medicine, University of Toronto, Toronto, Ontario, Canada

12

13 **Corresponding author: Ahmad Firas Khalid**

14 Address: School of Global Health, Victor Dahdaleh Building, Room 5022, 88 The Pond Road,

15 Toronto, ON, M3J 2S5, Canada

16 Telephone: (+1) 416-736-2100 ext 44340

17 Email: [khalidf@yorku.ca](mailto:khalidf@yorku.ca)

## 18 **Abstract**

19           Traditional didactic teaching approaches fall short of adequately supporting diverse  
20 student learning styles. Complementing didactic teaching approaches with simulation-based  
21 experiential learning has shown promise in bridging the gap between theoretical knowledge and  
22 practical application. However, few studies have rigorously examined the outcomes of this  
23 approach in global health education and training. This study aims to evaluate the impact of the  
24 World Health Organization World Health Assembly Simulation (WHA Sim), a simulation-based  
25 experiential learning platform designed to enhance the application of students' knowledge and  
26 skills in practical settings relating to global health governance.

27           We employed a sequential mixed-method study between September 2022 and July 2023,  
28 starting with an anonymous survey among undergraduate students in the Faculty of Health at  
29 York University, in order to evaluate self-reported quantitative metrics related to students'  
30 understanding of simulation-based learning prior to the WHA Sim. We also conducted  
31 qualitative interviews among participants of the WHA Sim from diverse health disciplines,  
32 aiming to capture multi-disciplinary perspectives. Data was analyzed using simple descriptive  
33 statistics for the quantitative data and a framework analysis for qualitative data.

34           Among 39 survey respondents, 18 were interviewed. The WHA Sim bolstered a wide  
35 array of skills, including research capabilities, critical analysis, time management, and  
36 organizational effectiveness. Participants also reported improvements in effective interpersonal  
37 communication, public speaking, networking, and solution-driven dialogues. Interpersonal skills  
38 like collaboration and leadership were notably improved. Moreover, the simulation provided an  
39 enhanced understanding of complex issues and offered a fertile ground for career preparation,  
40 filling existing knowledge gaps more effectively than traditional learning environments.

41 Findings demonstrate the value of simulation-based experiential learning among  
42 undergraduate students, which illustrates how the WHA Sim can serve as an effective learning  
43 tool within global health education and training.

44

#### 45 **Keywords**

46 Global Health Education, Experiential Learning, Simulation, World Health Assembly, Mixed-  
47 Methods, Interdisciplinary Education.

#### 48 **Contributions to the Literature**

49 This study contributes to the burgeoning literature on experiential learning in health sciences,  
50 particularly in the context of global health governance. It employs a robust mixed-method design  
51 to provide both breadth and depth of insights into the effectiveness of a simulation-based  
52 learning platform. This could be a blueprint for the development of future simulation-based  
53 educational initiatives in global health and related fields.

## 54 **Introduction**

55           The escalating frequency of health and humanitarian crises has significantly fueled  
56 students' engagement with global health topics and institutions, such as the World Health  
57 Organization, responsible for addressing these intricate challenges (1-4). Amidst this heightened  
58 interest, exacerbated by events like the COVID-19 pandemic, simulation-based experiential  
59 learning stands out as a transformative educational approach. It offers students a tangible  
60 application of theoretical knowledge and practical skills to real-world dilemmas; a method  
61 proven to bridge the gap between classroom theory and applied execution. However, a  
62 knowledge gap exists in how to effectively develop and implement these simulations to enhance  
63 students' analysis and problem-solving skills concerning complex global health issues. Previous  
64 studies vouching for experiential learning's efficacy often lack rigorous validation, leaving room  
65 for enhancement in this educational approach. Moreover, the deployment of simulations,  
66 especially in the realm of public and global health education, is a relatively untapped but  
67 burgeoning strategy.

68           Addressing this gap, our study introduces a novel approach by utilizing a simulation of  
69 the World Health Organization's World Health Assembly (WHA), replicating its role as the  
70 paramount decision-making body in global health. The WHA Simulation (WHA Sim) seeks to  
71 enhance knowledge and skills around collaborative governance approaches involving multi-  
72 sectoral and multi-jurisdictional global challenges, such as those found in the Sustainable  
73 Development Goals (SDGs). It enables the generation and testing of innovative and feasible  
74 solutions on the simulation theme in the form of research briefs, debates, and formal resolutions.  
75 This endeavor not only promises to augment the educational toolkit with a validated, immersive

76 experience but also prepares students more effectively for real-world challenges, thereby  
77 enhancing the overall quality of global health education and training activities.

78         According to classic experiential learning theory, individuals gain knowledge through  
79 concrete experience and abstract conceptualization and through reflective observation and active  
80 experimental (5, 6). In other words, the experience of engaging in the learning activity leads to  
81 new knowledge, learning, and skills development. Simulation-based learning in global health  
82 represents an innovative approach to experiential education, designed to extend beyond  
83 traditional classroom boundaries. This method facilitates the exploration and development of  
84 practical, effective strategies to address the multifaceted challenges inherent in global health. It  
85 also allows students to be better prepared with the types of skills required in the real-world job  
86 market because they will be working on developing their writing skills (e.g., policy briefs),  
87 communication skills (e.g., effectively presenting key points ), negotiation skills (e.g.,  
88 identifying areas of agreement/disagreement and how to manage them), leadership skills (e.g.,  
89 managing tight deadlines to deliver on resolutions), and team-building skills (e.g., working  
90 closely with other delegates on arriving at consensus) (3).

91         This study has three primary objectives. First, to detail the creation and implementation  
92 of the WHA Sim, thoroughly assessing its effectiveness as a teaching tool in undergraduate  
93 global health programs or initiatives. Second, to collect firsthand student insights on how  
94 simulation-based experiential learning enhances their skills in analyzing complex issues and  
95 formulating innovative solutions. Third, to expand our understanding of how this type of  
96 experiential learning in a global health simulation can better prepare students for future  
97 leadership positions in global health.

## 98 **Methods**

## 99 **Design**

100 We used a sequential mixed-method study design. This type of design combines elements of  
101 qualitative and quantitative research approaches to ensure that we arrive at the breadth and depth  
102 of understanding of the extent to which simulation-based experiential learning increases  
103 students' ability to analyze increasingly complex problems and develop innovative solutions.  
104 First, we conducted general and targeted needs assessments through an anonymous survey of  
105 students enrolled in the Faculty of Health at York University in Toronto, Canada. The survey  
106 focused on identifying the views and experiences of students' engagement in simulation-based  
107 experiential learning. Second, we used the insights generated from the survey to help inform  
108 qualitative interviews with students who took part in the WHA Sim week to derive an in-depth  
109 understanding of the knowledge they gained from the experience and feedback on ways to  
110 improve the delivery of simulation-based experiential learning to students. Findings were  
111 supported by observations of PI (Khalid, AF) at the WHA Sim.

## 112 **Characteristics of participants**

113 We purposively sampled current undergraduate students completing their studies in the  
114 Faculty of Health. We aimed to survey and interview a diverse group of students at the  
115 undergraduate level in programs/faculties of basic science, global health, nursing, health policy  
116 and management. The diversity in students is designed to depict multidisciplinary participation  
117 similar to real-world global health work and to encourage interprofessional education.

## 118 **Participant recruitment and sample size**

119 A two-stage sampling approach was used to identify and recruit key informants (7, 8).  
120 The first stage included recruiting students from various disciplines in the Faculty of Health. To  
121 recruit these participants, we created a York University centrally supported learning management

122 system (eClass) announcement distributed to Faculty of Health members to share on their course  
123 eClass site. We also sent out emails to Faculty of Health Program Administrators to share the  
124 advertisement of the study with students via email. Finally, the research team created a video to  
125 invite students to participate in the study, which was shared on the Faculty of Health Twitter  
126 page and on public domain profiles. The link to the survey was sent to the interested students  
127 who would contact us after checking their eligibility and getting their consent. To incentivize  
128 students' participation in our survey, we offered them a raffle for an Amazon gift card. The  
129 second stage involved respondent-driven sampling by which students in the first stage were  
130 asked to identify any additional informants. We planned to sub-sample participants for the semi-  
131 structured interviews from the pool of students who responded to the survey and enrolled in the  
132 WHA Sim. Given that our goal is to gain information from limitedly available and 'convenient'  
133 students to access, we anticipated a sample size of 35 – 50 students. We recruited 39 participants  
134 from our first stage of sampling, and 18 additional participants were identified through snowball  
135 sampling.

## 136 **Data collection methods**

### 137 ***Phase one: quantitative study***

138 Participants completed an online self-assessment survey administered using Microsoft  
139 Office 360 Forms (survey instrument available as an e-appendix). The survey was in English and  
140 consisted of three parts: (1) questions focusing on participants' background and demographic  
141 characteristics, (2) questions that captured participants' comfort and confidence in key practice  
142 skills, and (3) questions around participants' experiences and preferences with simulation-based  
143 learning.

### 144 ***Phase two: qualitative study***

145 Interviews with students who responded to the survey and participated in the WHA Sim were  
146 conducted in the weeks following WHA Sim week to encourage a high completion rate. Students  
147 were invited to engage in a 30-minute Zoom interview to share their perspectives on the WHA  
148 Sim experience. The discussion focused on several aspects: enhancing the WHA Sim platform,  
149 such as adjusting the simulation's pace and timing; identifying the key skills and competencies  
150 gained through participation; evaluating their readiness to assume leadership roles in addressing  
151 global health issues; and considering the educational value of the simulation as an integral part of  
152 their learning experience. Students were also asked to reflect on their main takeaway from  
153 participating in simulation-based learning using open-ended questions.

154         The interviews were audio-recorded after receiving permission from the participants.  
155 Audio recordings were transcribed verbatim (MG, CE, AS, FW) and the written transcriptions  
156 were used for data analysis. Potentially identifying information (e.g., name) was removed at the  
157 time of transcription. The language of the interview was in English. A pilot interview with a  
158 research team member, which was not included in the actual study, was conducted to refine the  
159 interview questions.

## 160 **Data analysis**

161         A mixed methods approach to data analysis was employed. For the survey, quantitative  
162 data was summarized using simple descriptive statistics (numbers, percentages, frequencies, and  
163 cross-tabulation). Data analysis included calculating descriptive statistics related to all assessed  
164 measures, including the background of participants, their experiences with experiential learning  
165 and their attitudes towards participating in simulation-based learning. For the semi-structured  
166 interview data, we used a deductive framework analysis approach for our collected data (9, 10).  
167 Framework analysis is a qualitative method that can be applied to research that has specific



168 questions and a limited time frame (9). This approach allowed us to describe and interpret what  
169 is happening in a particular setting (i.e., engaging in simulation-based learning) (10). It involved  
170 a five-step process: familiarization (i.e., immersing ourselves in collected data making notes of  
171 key ideas and recurrent themes), identifying a thematic framework (i.e., recognizing emerging  
172 themes), indexing (i.e., using NVivo to identify sections of data that correspond to particular  
173 themes), charting (i.e., arranging identified sections of data into table exhibits), and mapping and  
174 interpretation (i.e., analyzing key characteristics from the exhibits) (10).

## 175 **Results**

176 We first outline the detailed planning and execution process of the WHA Sim, followed  
177 by an overview of our participants. Subsequently, we present an analysis of how global health  
178 simulation-based experiential learning contributes to preparing students for future leadership  
179 roles in global health. We highlight the key themes that emerged, demonstrating the enhanced  
180 skills students developed through their engagement in the WHA Sim.

### 181 **WHA Sim**

182 The development of the WHA Sim began with the critical choice of a relevant global  
183 health theme. For the 2023 iteration, "Building Global Solidarity for Worldwide Health Security"  
184 was selected, spotlighting urgent health emergencies, especially pandemics, within both health  
185 and humanitarian domains. This theme was particularly pertinent given recent global health  
186 crises, like COVID-19 and Ebola, underscoring the dire need for enhanced crisis readiness and  
187 response systems. It also aligned with previous endeavors, such as the 2021 Model WHO  
188 Simulation Week in London, which similarly focused on pandemic readiness and recovery,  
189 incorporating elements like the One Health strategy, healthcare access, misinformation control,  
190 and safeguarding the well-being of healthcare workers. In line with our commitment to

191 inclusivity and accessibility, we did not charge students to participate in the simulation. This  
192 decision was crucial to ensure maximum participation and access.

193         The first day of the WHA Sim was delivered virtually, aimed at equipping delegates with  
194 essential skills such as understanding WHA Sim protocols, crafting position papers, and  
195 mastering debate strategies. Prior to the simulation, students were engaged in the critical task of  
196 drafting position papers. This activity necessitated thorough research and teamwork, leading  
197 students to formulate astute policy suggestions and innovative approaches. Such early  
198 involvement fostered a sense of accountability and bolstered students' confidence and active  
199 participation in subsequent discussions.

200         The following day transitioned to in-person simulation activities at York University. It  
201 featured an inaugural ceremony and an insightful panel discussion with global health luminaries,  
202 offering extensive perspectives on the chosen theme. After a short social break, participants  
203 plunged into the Opening Plenary and diversified Committee Sessions, addressing key issues like  
204 Public Health Emergencies, Infodemic Management, and Universal Health Coverage. These  
205 sessions were carefully organized by fellow students who had been appointed to roles within the  
206 Delegate Advisory and Information System (DIAS) well before the simulation began. The DIAS  
207 team included positions such as Chair, Vice-chair, and Secretariat. These students played crucial  
208 roles in creating a realistic World Health Assembly simulation experience. Additionally, they  
209 were instrumental in coordinating the drafting of position papers, as mentioned in the previous  
210 paragraph, ensuring a structured and authentic simulation process. Their leadership, marked by  
211 skilled diplomacy and an exceptional knack for consensus-building, was a standout aspect of the  
212 simulation. Notably, each committee was enriched by the presence of a technical expert, an

213 esteemed global health scholar, who deepened the debates with valuable insights and research-  
214 based knowledge.

215 The final day focused on the joint effort of creating and ratifying resolutions, highlighting  
216 the importance of collaborative decision-making. The resolutions and materials produced by  
217 participants were preserved for future sharing with experts at the World Health Organization.  
218 After a global health career panel and additional plenary discussions, the event concluded with  
219 parting words from notable figures like Dr. Tedros Ghebreyesus and Dr. Peter Singer of the  
220 WHO. This capstone day was not just about dialogue but also involved vital exchanges of  
221 inventive concepts and cooperative problem-solving – all crucial for fortifying global health  
222 governance. The event culminated in an awards ceremony, recognizing and celebrating the  
223 remarkable efforts and contributions of participants, particularly those who excelled in position  
224 paper submissions in each committee.

225 **Figure 1.** The four components that make up a WHA Simulation — role-based participant  
226 interaction, debate, discussion alliance formation, and draft resolution process.

### 227 **Participants’ characteristics**

228 There were 39 students who completed the survey and 18 students who completed the  
229 semi-structured interviews. Of the 18 participants participating in semi-structured interviews, one  
230 participant did not complete the pre-simulation survey. Table 1 presents the characteristics of the  
231 participants.

232 **Table 1.** Characteristics of Research Participants

| <b>Study Design</b> | <b># of Participants (n)</b> | <b>Organizational Affiliations</b> | <b>Program of Study</b> | <b>Academic Year</b> | <b>Sex</b>  |
|---------------------|------------------------------|------------------------------------|-------------------------|----------------------|-------------|
| <b>Survey</b>       | (n=39)                       | York University (n= 39)            | Global Health (n=34)    | Fourth-year (n= 21)  | 34 F<br>5 M |

|                                   |        |                         |                           |                    |             |
|-----------------------------------|--------|-------------------------|---------------------------|--------------------|-------------|
|                                   |        |                         | Health Management (n=3)   | Third-year (n= 6)  |             |
|                                   |        |                         | Biology (n=1)             | Second-year (n= 3) |             |
|                                   |        |                         | Biomedical Science (n=1)  | First-year (n= 3)  |             |
|                                   |        |                         |                           | Other (n= 6)       |             |
| <b>Semi-structured interviews</b> | (n=18) | York University (n= 18) | Global Health (n=17)      | Fourth-year (n=11) | 14 F<br>4 M |
|                                   |        |                         | Health Management (n = 1) | Third-year (n=3)   |             |
|                                   |        |                         |                           | Second-year (n= 1) |             |
|                                   |        |                         |                           | Other (n=3)        |             |

233

234 **Phase 1: Quantitative Results**

235 *Views and experiences in simulation-based experiential learning*

236 Participants' experiences and perceptions of simulation-based experiential learning were  
 237 explored in the study, as presented in Table 2. Regarding prior involvement in simulation-based  
 238 learning, only 33.33% of students had engaged in such activities, while a majority of 51.28% had  
 239 no previous involvement, and 15.38% were uncertain. Awareness levels of simulation-based  
 240 experiential learning were higher, with 66.67% of students knowledgeable about this educational  
 241 approach, 17.95% unaware, and 15.38% only somewhat aware. Familiarity with the World  
 242 Health Organization's World Health Assembly was prevalent, with 76.92% having heard of it,  
 243 though only 17.95% were knowledgeable about its purpose, and 5.13% had never encountered it.  
 244 The belief in the necessity of simulation-based learning for their education was strong among

245 students, with 59.97% in agreement, though a notable 38.46% remained unsure, and a minimal  
 246 2.56% disagreed. Inquiry into the integration of any form of simulation-based learning during  
 247 their degree revealed mixed responses: 38.46% confirmed its presence, 41.03% denied it, and  
 248 20.51% were uncertain. Assessing the efficacy of simulation-based learning in preparing  
 249 students for real-world experiences yielded positive views: 48.72% found it very effective and  
 250 51.28% deemed it somewhat effective, with none of the respondents labeling it as ineffective in  
 251 any degree. These results suggest a recognition of the value of simulation-based learning among  
 252 students, although exposure to and comprehensive understanding of such educational strategies  
 253 appear to be varied.

254 **Table 2.** Summary of findings table

| <b>Students' views and experiences in simulation-based experiential learning.</b>               |                                              | <b>N (%)</b> |
|-------------------------------------------------------------------------------------------------|----------------------------------------------|--------------|
| <b>Involvement in simulation-based learning</b>                                                 | <i>Yes</i>                                   | 13 (33.33)   |
|                                                                                                 | <i>No</i>                                    | 20 (51.28)   |
|                                                                                                 | <i>Not sure</i>                              | 6 (15.38)    |
| <b>Awareness of what simulation-based experiential learning is</b>                              | <i>Yes</i>                                   | 26 (66.67)   |
|                                                                                                 | <i>No</i>                                    | 7 (17.95)    |
|                                                                                                 | <i>Somewhat</i>                              | 6 (15.38)    |
| <b>Awareness of what a World Health Organization World Health Assembly is about</b>             | <i>Never heard of it before</i>              | 2 (5.13)     |
|                                                                                                 | <i>Heard of it before</i>                    | 30 (76.92)   |
|                                                                                                 | <i>Partially aware of what it is</i>         | 7 (17.95)    |
| <b>Belief that simulation-based learning is a necessary aspect of learning</b>                  | <i>Yes</i>                                   | 23 (58.97)   |
|                                                                                                 | <i>No</i>                                    | 1 (2.56)     |
|                                                                                                 | <i>Not sure</i>                              | 15 (38.46)   |
| <b>Incorporation of any form of simulation-based learning during degree completion</b>          | <i>Yes</i>                                   | 15 (38.46)   |
|                                                                                                 | <i>No</i>                                    | 16 (41.03)   |
|                                                                                                 | <i>Not sure</i>                              | 8 (20.51)    |
| <b>Views on how effective simulation-based learning in preparing for real-world experiences</b> | <i>Very effectively</i>                      | 19 (48.72)   |
|                                                                                                 | <i>Somewhat effectively</i>                  | 20 (51.28)   |
|                                                                                                 | <i>Very ineffectively</i>                    | 0            |
|                                                                                                 | <i>Somewhat ineffectively</i>                | 0            |
|                                                                                                 | <i>Neither effectively nor ineffectively</i> | 0            |

255

| <b>Students' Levels of Comfort and Confidence in Key Practical Skills.</b> | <b>N (%)</b> |
|----------------------------------------------------------------------------|--------------|
|----------------------------------------------------------------------------|--------------|

|                                                                                                        |                          |            |
|--------------------------------------------------------------------------------------------------------|--------------------------|------------|
| <b>Confidence in communicating with others (e.g., colleagues)</b>                                      | <i>Strongly agree</i>    | 16 (41.03) |
|                                                                                                        | <i>Agree</i>             | 20 (51.28) |
|                                                                                                        | <i>Disagree</i>          | 3 (7.69)   |
|                                                                                                        | <i>Strongly disagree</i> | 0          |
| <b>Comfort in communicating with leadership (e.g., decision-makers, professors, technical experts)</b> | <i>Strongly agree</i>    | 10 (25.64) |
|                                                                                                        | <i>Agree</i>             | 16 (41.03) |
|                                                                                                        | <i>Disagree</i>          | 12 (30.77) |
|                                                                                                        | <i>Strongly disagree</i> | 1 (2.56)   |
| <b>Comfort in delegating tasks to team members</b>                                                     | <i>Strongly agree</i>    | 11 (28.21) |
|                                                                                                        | <i>Agree</i>             | 24 (61.54) |
|                                                                                                        | <i>Disagree</i>          | 4 (10.26)  |
|                                                                                                        | <i>Strongly disagree</i> | 0          |
| <b>Difficulty in prioritizing tasks</b>                                                                | <i>Strongly agree</i>    | 2 (5.13)   |
|                                                                                                        | <i>Agree</i>             | 13 (33.33) |
|                                                                                                        | <i>Disagree</i>          | 19 (48.72) |
|                                                                                                        | <i>Strongly disagree</i> | 5 (12.82)  |
| <b>Confidence in problem-solving</b>                                                                   | <i>Strongly agree</i>    | 11 (28.95) |
|                                                                                                        | <i>Agree</i>             | 22 (57.89) |
|                                                                                                        | <i>Disagree</i>          | 5 (13.16)  |
|                                                                                                        | <i>Strongly disagree</i> | 0          |
| <b>Opportunities to practice time management skills</b>                                                | <i>Strongly agree</i>    | 16 (41.03) |
|                                                                                                        | <i>Agree</i>             | 22 (56.41) |
|                                                                                                        | <i>Disagree</i>          | 1 (2.56)   |
|                                                                                                        | <i>Strongly disagree</i> | 0          |
| <b>Opportunities to critically analyze and problem solve</b>                                           | <i>Strongly agree</i>    | 13 (33.33) |
|                                                                                                        | <i>Agree</i>             | 24 (61.54) |
|                                                                                                        | <i>Disagree</i>          | 2 (5.13)   |
|                                                                                                        | <i>Strongly disagree</i> | 0          |
| <b>Comfort in asking for help</b>                                                                      | <i>Strongly agree</i>    | 14 (35.90) |
|                                                                                                        | <i>Agree</i>             | 18 (46.15) |
|                                                                                                        | <i>Disagree</i>          | 7 (17.95)  |
|                                                                                                        | <i>Strongly disagree</i> | 0          |
| <b>Confidence in using current evidence to solve global health problems</b>                            | <i>Strongly agree</i>    | 17 (43.59) |
|                                                                                                        | <i>Agree</i>             | 21 (53.85) |
|                                                                                                        | <i>Disagree</i>          | 1 (2.56)   |
|                                                                                                        | <i>Strongly disagree</i> | 0          |
| <b>Readiness for professional practice after graduation</b>                                            | <i>Strongly agree</i>    | 8 (20.51)  |
|                                                                                                        | <i>Agree</i>             | 18 (46.15) |
|                                                                                                        | <i>Disagree</i>          | 10 (25.64) |

256  
257

|  |                          |          |
|--|--------------------------|----------|
|  | <i>Strongly disagree</i> | 3 (7.69) |
|--|--------------------------|----------|

*Confidence in problem-solving: A student did not answer this question, resulting in n=38.*

| <b>Students perception of the role of simulation-based learning in preparing for real-world career skills</b> |                         | <b>N (%)</b> |
|---------------------------------------------------------------------------------------------------------------|-------------------------|--------------|
| <b>Orientation to work environment</b>                                                                        | <i>Very helpful</i>     | 27 (69.23)   |
|                                                                                                               | <i>A little helpful</i> | 4 (10.26)    |
|                                                                                                               | <i>Somewhat helpful</i> | 8 (20.51)    |
|                                                                                                               | <i>Not helpful</i>      | 0            |
|                                                                                                               | <i>Not applicable</i>   | 0            |
| <b>Ability to tackle complex global health challenges</b>                                                     | <i>Very helpful</i>     | 29 (74.36)   |
|                                                                                                               | <i>A little helpful</i> | 2 (5.13)     |
|                                                                                                               | <i>Somewhat helpful</i> | 7 (17.95)    |
|                                                                                                               | <i>Not helpful</i>      | 0            |
|                                                                                                               | <i>Not applicable</i>   | 1 (2.56)     |
| <b>Managing workloads (e.g., organizing, prioritizing)</b>                                                    | <i>Very helpful</i>     | 21 (53.85)   |
|                                                                                                               | <i>A little helpful</i> | 3 (7.69)     |
|                                                                                                               | <i>Somewhat helpful</i> | 15 (38.46)   |
|                                                                                                               | <i>Not helpful</i>      | 0            |
|                                                                                                               | <i>Not applicable</i>   | 0            |
| <b>Confidence in delegation, knowledge and critical thinking</b>                                              | <i>Very helpful</i>     | 29 (74.36)   |
|                                                                                                               | <i>A little helpful</i> | 1 (2.56)     |
|                                                                                                               | <i>Somewhat helpful</i> | 8 (20.51)    |
|                                                                                                               | <i>Not helpful</i>      | 0            |
|                                                                                                               | <i>Not applicable</i>   | 1 (2.56)     |
| <b>Understanding role expectations and legal/regulatory issues (e.g., autonomy, more responsibility)</b>      | <i>Very helpful</i>     | 27 (69.23)   |
|                                                                                                               | <i>A little helpful</i> | 1 (2.56)     |
|                                                                                                               | <i>Somewhat helpful</i> | 9 (23.08)    |
|                                                                                                               | <i>Not helpful</i>      | 0            |
|                                                                                                               | <i>Not applicable</i>   | 2 (5.13)     |
| <b>Confidence in communication with others including decision-makers</b>                                      | <i>Very helpful</i>     | 25 (64.10)   |
|                                                                                                               | <i>A little helpful</i> | 2 (5.13)     |
|                                                                                                               | <i>Somewhat helpful</i> | 11 (28.21)   |
|                                                                                                               | <i>Not helpful</i>      | 0            |
|                                                                                                               | <i>Not applicable</i>   | 1 (2.56)     |
| <b>Knowing when to ask for assistance</b>                                                                     | <i>Very helpful</i>     | 17 (43.59)   |
|                                                                                                               | <i>A little helpful</i> | 6 (15.38)    |
|                                                                                                               | <i>Somewhat helpful</i> | 16 (41.03)   |
|                                                                                                               | <i>Not helpful</i>      | 0            |
|                                                                                                               | <i>Not applicable</i>   | 0            |

|                                                              |                         |            |
|--------------------------------------------------------------|-------------------------|------------|
|                                                              |                         |            |
| <b>Respecting diverse cultural perspectives and opinions</b> | <i>Very helpful</i>     | 22 (56.41) |
|                                                              | <i>A little helpful</i> | 4 (10.26)  |
|                                                              | <i>Somewhat helpful</i> | 12 (30.77) |
|                                                              | <i>Not helpful</i>      | 1 (2.56)   |
|                                                              | <i>Not applicable</i>   | 0          |
| <b>Documenting and using technology proficiently</b>         | <i>Very helpful</i>     | 21 (53.85) |
|                                                              | <i>A little helpful</i> | 4 (10.26)  |
|                                                              | <i>Somewhat helpful</i> | 11 (28.21) |
|                                                              | <i>Not helpful</i>      | 0          |
|                                                              | <i>Not applicable</i>   | 3 (7.69)   |
| <b>Working in collective decision-making settings</b>        | <i>Very helpful</i>     | 29 (76.32) |
|                                                              | <i>A little helpful</i> | 2 (5.26)   |
|                                                              | <i>Somewhat helpful</i> | 6 (15.79)  |
|                                                              | <i>Not helpful</i>      | 0          |
|                                                              | <i>Not applicable</i>   | 1 (2.63)   |
| <b>Enhancing your leadership skills</b>                      | <i>Very helpful</i>     | 30 (78.95) |
|                                                              | <i>A little helpful</i> | 0          |
|                                                              | <i>Somewhat helpful</i> | 5 (13.16)  |
|                                                              | <i>Not helpful</i>      | 1 (2.63)   |
|                                                              | <i>Not applicable</i>   | 2 (5.26)   |

258 *Working in collective decision-making settings: A student did not answer this question, resulting*  
 259 *in n=38.*

260 *Enhancing your leadership skills: A student did not answer this question, resulting in n=38.*

261

262 ***Comfort and confidence in key practical skills***

263           Upon completing an online self-assessment survey, participants revealed diverse  
 264 perceptions of their practical skills and preparedness for professional practice, as detailed in  
 265 Table 2. A substantial majority expressed high confidence in their communication abilities  
 266 (92.31% total for strongly agree and agree) and problem-solving skills (86.84% total for strongly  
 267 agree and agree). However, comfort in interacting with leadership was less robust, with only  
 268 66.67% in the affirmative and a not insignificant 33.33% expressing discomfort. Delegating  
 269 tasks was viewed favorably by 89.75%, yet participants acknowledged challenges in task



270 prioritization, with a majority (61.54%) experiencing difficulties. The survey also indicated  
271 strong recognition of opportunities to hone time management skills (97.44%) and to engage in  
272 critical problem-solving (94.87%). Most participants were comfortable seeking help (81.05%),  
273 and nearly all expressed confidence in utilizing evidence-based approaches to global health  
274 issues (97.44%). In contrast, readiness for professional practice post-graduation elicited a more  
275 measured response, with a combined affirmative response of only 66.66%, suggesting a gap in  
276 perceived career preparedness. These insights, derived from the self-assessment, emphasize the  
277 need for educational programs to strategically reinforce areas of confidence while addressing  
278 identified gaps in professional readiness.

### 279 ***Preparing for real-world career skills***

280 In assessing the impact of simulation-based learning on real-world career skill  
281 preparation (Table 3), students predominantly acknowledged its substantial benefits across  
282 multiple competencies. A majority found it "very helpful" in familiarizing themselves with work  
283 environments (69.23%), tackling global health challenges (74.36%), and enhancing critical skills  
284 such as delegation, knowledge application, and critical thinking (74.36%). Similarly,  
285 understanding role expectations and legal matters (69.23%), effective communication (64.10%),  
286 and cultural respect (56.41%) were areas where simulations were considered significantly  
287 advantageous. Though the perceived helpfulness slightly diminished in aspects like managing  
288 workloads (53.85%), technology use (53.85%), and recognizing when to seek help (43.59%), the  
289 majority still recognized the value. Impressively, collective decision-making (76.32%) and  
290 leadership skills (78.95%) were areas where simulations were deemed most beneficial. These  
291 findings underscore the critical role of simulation-based learning in bolstering practical career  
292 skills among students, despite some variability in perceived efficacy across different domains.

293 **Table 3.** Overview of Student Evaluations on the Influence of Simulation-Based Learning in  
294 Enhancing Real-World Career Skills Across Three Core Competency Areas

| Professional Development                                                                                                                          | Interpersonal Skills                                                                                                                                       | Knowledge and Understanding                                                                                                                                                                                                                             |
|---------------------------------------------------------------------------------------------------------------------------------------------------|------------------------------------------------------------------------------------------------------------------------------------------------------------|---------------------------------------------------------------------------------------------------------------------------------------------------------------------------------------------------------------------------------------------------------|
| <ul style="list-style-type: none"><li>• Communication</li><li>• Confidence</li><li>• Preparation for future career</li><li>• Leadership</li></ul> | <ul style="list-style-type: none"><li>• Teamwork</li><li>• Critical thinking</li><li>• Collaboration</li><li>• Compromise</li><li>• Organization</li></ul> | <ul style="list-style-type: none"><li>• Enhanced understanding of processes</li><li>• Exposure to complex problems</li><li>• Making intellectual inquiries</li><li>• Highlighting knowledge gaps</li><li>• Retention through applied learning</li></ul> |

295

## 296 **Phase 2: Qualitative results**

### 297 *Deepening of knowledge and practical understanding*

298 The analysis of 18 semi-structured interviews reveals a consensus among students:  
299 participation in the WHA Sim significantly deepened their practical understanding and  
300 knowledge. This finding is crucial in evaluating our research question about the role of  
301 simulation-based experiential learning in enhancing students' problem-solving and innovative  
302 thinking in complex global health scenarios.

303 Students reported themes of enhanced processes understanding, classroom concepts  
304 solidification, complex problem exposure, knowledge gaps identification, and concept retention  
305 via applied learning. One remarked:

306

307 *“Interacting with various fields and applying knowledge in real-world*  
308 *contexts made me realize my extensive learning over four years... I’ve become*  
309 *a specialist with substantial expertise, which is key for career success.”*

310 Another highlighted the bridge between theory and practice: “[...] with the simulation,  
311 you can apply theories and see what works and what doesn't, which enhances learning.”  
312 Participation also improved intellectual engagement. One student shared, “Being around people  
313 who ask questions and engage, I learned to do the same... asking the right questions can build  
314 valuable mentor relationships.”

315 Furthermore, the WHA Sim encouraged more open, creative problem-solving. A  
316 participant noted: “The absence of a rubric allowed for creative, collaborative  
317 solutions, free from strict guidelines.” Another appreciated the reduced pressure,  
318 adding, “Not being evaluated made it easier to engage and apply my knowledge.”

319 These reflections affirm the simulation's effectiveness in fostering both deep  
320 understanding and practical skills essential for addressing global health complexities, thus  
321 providing profound insights into our research inquiry.

### 322 ***Interpersonal Skills and Collaboration***

323 Many students reported a marked improvement in their ability to work effectively within  
324 teams and engage in compromise, essential skills for both problem-solving and leadership. One  
325 participant shared,

326 “Collaborating with people who may lack certain background knowledge  
327 taught me how to balance giving feedback without coming across as critical or  
328 taking control of the project. It’s about expressing ideas clearly without hurting  
329 anyone’s feelings and ensuring the final product is something we’re all proud  
330 of.”

331 Additionally, the WHA Sim seemed to significantly bolster students' critical thinking  
332 skills, a crucial aspect of analyzing complex issues and innovating solutions. One student

333 reflected, *“The simulation made me think out of the box when I’m creating solutions for a certain*  
334 *problem.”* Another noted the complexity of global health challenges: *“We have to think critically*  
335 *about how some of these global health problems actually play out. It's not a sugar-coated thing*  
336 *where we can just say, oh, let's just do this, it's a lot more complex.”*

337 Furthermore, the simulation underscored the power of collective problem-solving and  
338 fostered a solution-driven environment. A student observed, *“It was an opportunity for me to*  
339 *work with my classmates, which is something outside of the classroom that we don't often get a*  
340 *chance to do.”* This sentiment was echoed by another:

341 *“Working in smaller groups allowed us to brainstorm ideas collaboratively,*  
342 *resulting in more innovative solutions. Someone would suggest an idea, and*  
343 *others would build upon it, leading to the evolution and improvement of our*  
344 *concepts over time.”*

345 The experiential learning setup of the WHA Sim also seemed to inspire a deeper  
346 understanding of the practicalities and challenges of real-world global health efforts. Students  
347 noted insights gained into the intricacies of change management and the patience required for  
348 impacting large-scale perspectives. One stated, *“I think that's one of the things that the WHA Sim*  
349 *helped with is the practicality of how a lot of this work is being done behind the scenes”*, while  
350 another reflected on the complexity of convincing diverse stakeholders, *“It's about like changing*  
351 *entire populations' perspectives, which requires a lot more patience and intentionality than*  
352 *trying to convince one person at a time.”*

353 Moreover, the simulation seemed to act as a catalyst for students to visualize themselves  
354 as change agents, particularly regarding the Sustainable Development Goals (SDGs). One

355 student felt the experience was instrumental in inspiring new ideas and potential research  
356 directions, asserting,

357 *“Having that simulation will help inspire new ideas... we can help be the*  
358 *agents of change that help facilitate issues, especially the SDG goals. We*  
359 *can really help resolve that and find ways to resolve that. I think the*  
360 *simulation is good to have to find solutions for the world's issues, if that*  
361 *makes sense.”*

### 362 ***Professional development***

363 Participants identified the WHA Sim as a unique opportunity for experiential learning  
364 that contributed significantly to their professional growth. The immersive nature of the  
365 simulation allowed students to *“think on their feet,”* a stark contrast to traditional classroom  
366 presentations. This environment also fostered public speaking skills because, as one student  
367 articulated, *“[...] you’re building that skill”* in a non-judgmental setting.

368 Moreover, the WHA Sim provided students with a realistic preview of potential career  
369 paths, as well as an environment to assess and develop their competencies. One student  
370 contemplated their future, stating,

371 *“I think just from like picturing myself working later on. As someone who’s*  
372 *always said they would love to work in the World Health Organization, I was*  
373 *like okay it would be good to participate in this kind of opportunity and just get*  
374 *a sense for what it would feel like and the exact skills that are needed just to see*  
375 *if what I currently have would be enough or what I need to improve on.”*

376 This reflection underscores the simulation's role in career preparation and skill  
377 assessment, further echoed by another participant: *“[...] that helped me to identify my*

378 *weaknesses and actually see it not even like just I know, but I'll be in this part and seeing that I*  
379 *actually need to work on my articulation”.*

380 Students also recognized the simulation's efficacy in presenting "*real-world career*  
381 *options*", giving them the confidence and preparation for their future roles in global health. The  
382 practical experience of the WHA Sim, far removed from theoretical learning, offered students  
383 insights into the complexities of global health leadership and diplomacy. As one student  
384 succinctly put it, it is about the “confidence that it gave me.”

385 Furthermore, the WHA Sim environment nurtured leadership skills in ways traditional  
386 classrooms could not. Participants were compelled to take up active leadership roles, navigating  
387 challenges and decision-making without a predefined path. One student reflected on this growth:  
388 “*The main thing is how to be a leader. [...] But this was new and so you had to step up [...]*”.

## 389 **Discussion**

390 Our study examined the extent of simulation-based experiential learning in enhancing  
391 students' abilities to analyze complex issues and devise innovative solutions, particularly within  
392 the realm of global health. A significant finding was that despite varied exposure to simulation-  
393 based experiential learning, there was a unanimous recognition of its value, with students  
394 attesting to its effectiveness in bridging theoretical knowledge and practical skills. Notably, the  
395 WHA Sim deepened participants' comprehension of global health complexities, encouraging  
396 creative, problem-solving, and fostering intellectual engagement, critical thinking, and effective  
397 collaboration. The simulation environment also significantly bolstered participants' confidence in  
398 communication, problem-solving, and leadership, despite some expressing initial discomfort in  
399 interacting with leadership and acknowledging challenges in task prioritization.

400 In terms of the implications for preparing students for future leadership positions in  
401 global health, the study highlighted the indispensable role of simulation-based experiential  
402 learning in professional development. The WHA Sim was particularly impactful, providing a  
403 realistic preview of potential career paths and serving as a platform for students to evaluate and  
404 hone their skills, significantly contributing to their career preparedness. Participants reported  
405 enhancements in various competencies, including public speaking, critical thinking, and  
406 leadership, attributing this growth to the unique challenges presented by the simulation. The  
407 immersive experience allowed students to project themselves into their future careers,  
408 particularly those aspiring to positions at organizations like the WHO, offering them a practical  
409 perspective on the skills they need to develop or refine. Moreover, the study found that the  
410 simulation's practical experience, distinct from theoretical learning, offered invaluable insights  
411 into the intricacies of global health leadership and diplomacy, empowering students with greater  
412 insight into what it would take to assume a future leadership role.

### 413 **Findings in relation to other studies**

414 The skill sets honed by students during the WHA Sim, encompassing writing,  
415 communication, leadership, and teamwork, reflect the competencies sought in the contemporary  
416 job market. These developed abilities resonate with Kolb's experiential learning theory,  
417 underscoring the necessity to diminish the skill gap between academic learning and professional  
418 requirements (5). Notably, the simulation's real-world fidelity, whether in mirroring the actual  
419 WHA procedures or emulating potential workplace challenges and resolutions, was pivotal. This  
420 adherence to realism not only enriched the learning experience but also aligned with the National  
421 Society for Experiential Education's best practices (11). The experiential approach's veracity

422 served as a catalyst for student motivation, with learners perceiving the knowledge gained as  
423 both pertinent and transferrable to their prospective careers (12).

424 Active engagement's centrality in academic achievement is well-documented, with  
425 studies, like Hake (1998) showing that interactive methods in an introductory physics course  
426 nearly doubled the conceptual comprehension scores relative to traditional lectures (13). While  
427 our study did not evaluate test scores, the WHA Sim's interactive nature reportedly bolstered  
428 knowledge retention and the practical application of concepts among students. Additionally, the  
429 origins of simulation-based learning are rooted in fields like aviation and military (14). Its  
430 effectiveness is well-established within certain disciplines (15-17); however, these analyses  
431 typically concentrate on singular fields, lacking a cross-disciplinary perspective. Our research  
432 contributes a multifaceted view, expanding comprehension of simulation-based experiential  
433 learning's effects across various sectors, including healthcare, public health, decision-making,  
434 and policy development (4). This multidisciplinary approach offers broader insights into the  
435 method's implications across diverse fields.

### 436 **Strengths and limitations**

437 There are three strengths to this study. Firstly, this is the first study to address the  
438 knowledge gap in our understanding of the direct impact of simulation-based experiential  
439 learning on global health students' preparedness for real-world challenges and leadership roles.  
440 By focusing on both the quantitative self-assessments of students and qualitative feedback  
441 obtained through semi-structured interviews, the study offers a comprehensive perspective,  
442 balancing statistical data with personal experiences and insights. Secondly, the study's  
443 incorporation of a simulation of the World Health Assembly provides a unique, immersive  
444 learning environment that closely mirrors the complexities and dynamics of global health



445 diplomacy and decision-making processes. This realism adds a layer of practical experience to  
446 theoretical knowledge, helping to evaluate students' problem-solving and leadership skills in a  
447 manner that more traditional, classroom-based learning methodologies could not replicate.  
448 Thirdly, the diverse range of participants, encompassing various academic backgrounds, cultural  
449 perspectives, and levels of expertise, contributes to the robustness of the data and the universality  
450 of the findings. This diversity ensures that the insights and conclusions drawn are not overly  
451 specific to a particular subgroup of students but are instead indicative of broader trends and  
452 potentials within the realm of global health education. One limitation is the potential for self-  
453 assessment bias in the quantitative sections of the research, as students might overestimate or  
454 underestimate their competencies and experiences, which could affect the reliability of the data.  
455 To address this limitation regarding potential self-assessment bias, we designed the survey with a  
456 five-point scale for self-evaluation. This approach helped students accurately identify their level  
457 of competency, offering a suitable option even for those who considered themselves at an  
458 intermediate level.

### 459 **Implications for teaching practice**

460 Our research proposes five strategies for enhancing simulation-based experiential  
461 learning to strengthen students' capabilities in dissecting complex issues and crafting innovative  
462 solutions in global health, while also fortifying their professional preparedness for careers in this  
463 critical sector:

464 **1. Embracing Interdisciplinary Approaches:** This involves incorporating diverse academic  
465 perspectives and methodologies, encouraging students to think beyond traditional boundaries and  
466 understand the multifaceted nature of global health challenges. By engaging with varied

467 disciplines, students gain a holistic view that is essential for effective problem-solving in a  
468 complex, interconnected world.

469 **2. Increasing Simulation Realism:** By intensifying the authenticity of simulations, including  
470 real-world scenarios, stakeholder dynamics, and unexpected challenges, students are immersed  
471 in the realities that they will face in professional settings. This heightened realism ensures that  
472 learners are tested and adapted to conditions reflecting actual global health crises, enhancing  
473 their practical skills and decision-making confidence.

474 **3. Providing Structured Reflection:** Post-simulation debriefing sessions with technical experts  
475 should be integral, enabling students to reflect on their experiences, actions, and outcomes.  
476 Through guided reflection, they can identify strengths, acknowledge weaknesses, and understand  
477 the consequences of their decisions, which deepens learning and fosters personal and  
478 professional growth.

479 **4. Focusing on Essential Skills:** Simulation-based experiential learning should be meticulously  
480 designed to cultivate key competencies such as critical thinking, communication, teamwork, and  
481 leadership. Tailoring scenarios and roles to target these skills ensures that students are equipped  
482 with the essential tools that they will need to be effective leaders and collaborators in the field of  
483 global health.

484 **5. Emphasizing Cultural Competency:** Given the global nature of public health, it is crucial for  
485 simulations to encompass diverse cultural contexts, encouraging students to navigate and respect  
486 different cultural perspectives. This exposure prepares them to handle sensitive health issues  
487 adeptly, communicate effectively across cultures, and implement solutions that are culturally  
488 respectful and sustainable.

489           The results of our study carry with them some implications for academic institutions,  
490 highlighting the necessity to integrate more simulation-based experiential learning into global  
491 health curriculums. These findings suggest that simulations, such as the WHA Sim, offers  
492 students tangible benefits not always attainable through traditional learning methods or  
493 classroom settings. By participating in real-world scenario simulations, students develop critical  
494 soft skills, including strategic communication, leadership, problem-solving, and consensus-  
495 building, all of which are integral to effective global health leadership and management.

496           Academic institutions, therefore, should consider expanding their investment in  
497 simulation-based experiential learning methodologies. This might entail the development of  
498 comprehensive simulation programs, collaboration with global health organizations, or the  
499 integration of technology to create immersive, interactive learning environments. Moreover,  
500 faculty members could benefit from professional development in simulation facilitation, ensuring  
501 that these simulations are as effective and reflective of current global health challenges as  
502 possible. Furthermore, the establishment of longitudinal tracking systems to monitor graduates'  
503 career progress post-simulation-based experiential learning could provide valuable data to  
504 continuously refine and validate these educational approaches. This commitment not only  
505 enhances the educational experience but also ensures that institutions are producing well-  
506 equipped, adaptable professionals ready to face the multifaceted challenges present in the global  
507 health landscape.

#### 508 **Future research**

509           Future research should explore the enduring impact of simulation-based experiential  
510 learning on the life-long learning and careers of global health students. This involves following  
511 the professional development of participants over an extended period to assess how the WHA

512 Sim experience affects their future engagement with training and professional development  
513 opportunities, career decisions, leadership roles, and contributions to the global health field.  
514 Furthermore, it is important to conduct studies comparing simulation-based experiential learning  
515 with alternative educational strategies in global health education. Such studies would clarify the  
516 specific advantages and drawbacks of each method, providing valuable insights for shaping  
517 curricula and directing educational and training resources.

## 518 **Conclusions**

519 In conclusion, the WHA Sim emerges as an invaluable tool in preparing global health  
520 students for future leadership positions. It does so by enhancing essential communication skills,  
521 enhanced processes understanding, classroom concepts solidification, complex problem  
522 exposure, knowledge gaps identification, and concept retention via applied learning offering a  
523 realistic appraisal, and understanding of global health careers, and fostering the development of  
524 leadership skills in an applied, real-world context.

525 **Abbreviations:**

526 DIAS - Delegate Advisory and Information System

527 SDG - Sustainable Development Goals

528 WHA - World Health Assembly

529 WHA Sim – World Health Assembly Simulation

530 WHO – World Health Organization

531 **Declarations**

532 *Ethical approval and consent to participate*

533 Ethical approval was obtained from the Office of Research Ethics (ORE) at York University.

534 Certificate #: e2022-401. We obtained written and verbal consent from all participants.

535 *Consent for publication*

536 Not applicable.

537 *Availability of data and material*

538 All data generated or analyzed during this study are included in this published article (and its

539 supplementary information files).

540 *Competing interests*

541 All authors declare that they have no competing interests.

542 *Funding*

543 Dahdaleh Institute for Global Health Research, York University Faculty Association, York

544 University Academic Innovation Fund, and Jack & Mae Nathanson Centre on Translational

545 Human Rights, Crime and Security.

546 *Authors' contributions*

547 AFK conceived, analyzed and interpreted the data, and drafted the manuscript. MG, CE, AS, FW  
548 assisted in collection of the data. AFK and MG designed the survey and was a major contributor  
549 in analyzing and writing quantitative data. MG and AMV were major contributors in interpreting  
550 the data and in editing the manuscript. All authors read and approved the final manuscript.

551 *Acknowledgements*

552 The authors extend their gratitude to the team at the Dahdaleh Institute for Global Health  
553 Research, the School of Global Health, and the broader York University community for their  
554 invaluable support in initiating the first WHA Sim.

## 555 **References**

- 556 1. Eyler J. The power of experiential education. *Liberal education*. 2009;95(4):24-31.
- 557 2. Gosen J, Washbush J. A review of scholarship on assessing experiential learning  
558 effectiveness. *Simulation & gaming*. 2004;35(2):270-93.
- 559 3. Hsieh J-L, Sun C-T, Kao GY-M, Huang C-Y. Teaching through simulation: Epidemic  
560 dynamics and public health policies. *Simulation*. 2006;82(11):731-59.
- 561 4. Loutet MG, Zhang J, Varsaneux O, Ferguson A, Hulme J, Stone S, et al. Using  
562 Experiential Simulation-Based Learning to Increase Engagement in Global Health Education: an  
563 Evaluation of Self-reported Participant Experience. *Medical Science Educator*. 2020;30(3):1245-  
564 53.
- 565 5. Kolb DA. *Experiential learning: Experience as the source of learning and development*:  
566 FT press; 2014.
- 567 6. Kolb DA, Boyatzis RE, Mainemelis C. *Experiential learning theory: Previous research  
568 and new directions. Perspectives on thinking, learning, and cognitive styles*: Routledge; 2014. p.  
569 227-48.
- 570 7. Yin R. *Basic types of designs for case studies. Case study research: design and methods  
571 5th ed*. 2014.
- 572 8. Gentles SJ, Charles C, Ploeg J, McKibbin KA. Sampling in qualitative research: Insights  
573 from an overview of the methods literature. *The qualitative report*. 2015;20(11):1772-89.
- 574 9. Srivastava A, Thomson SB. *Framework analysis: a qualitative methodology for applied  
575 policy research*. 2009.
- 576 10. Ritchie J, Spencer L. Qualitative data analysis for applied policy research. *The qualitative  
577 researcher's companion*. 2002;573(2002):305-29.
- 578 11. Katula RA, Threnhauser E. Experiential education in the undergraduate curriculum.  
579 *Communication Education*. 1999;48(3):238-55.
- 580 12. Hoffman SJ, Silverberg SL. Training the next generation of global health advocates  
581 through experiential education: A mixed-methods case study evaluation. *Canadian Journal of  
582 Public Health*. 2015;106:e442-e9.
- 583 13. Hake RR. Interactive-engagement versus traditional methods: A six-thousand-student  
584 survey of mechanics test data for introductory physics courses. *American journal of Physics*.  
585 1998;66(1):64-74.
- 586 14. Hall K. Simulation-based learning in Australian undergraduate mental health nursing  
587 curricula: a literature review. *Clinical Simulation in Nursing*. 2017;13(8):380-9.
- 588 15. Gaba DM. The future vision of simulation in health care. *BMJ Quality & Safety*.  
589 2004;13(suppl 1):i2-i10.
- 590 16. Lateef F. What's new in emergencies, trauma, and shock? Role of simulation and  
591 ultrasound in acute care. *Journal of Emergencies, Trauma and Shock*. 2008;1(1):3.
- 592 17. Miller JL, Rambeck JH, Snyder A. Improving emergency preparedness system readiness  
593 through simulation and interprofessional education. *Public health reports*.  
594 2014;129(6\_suppl4):129-35.
- 595

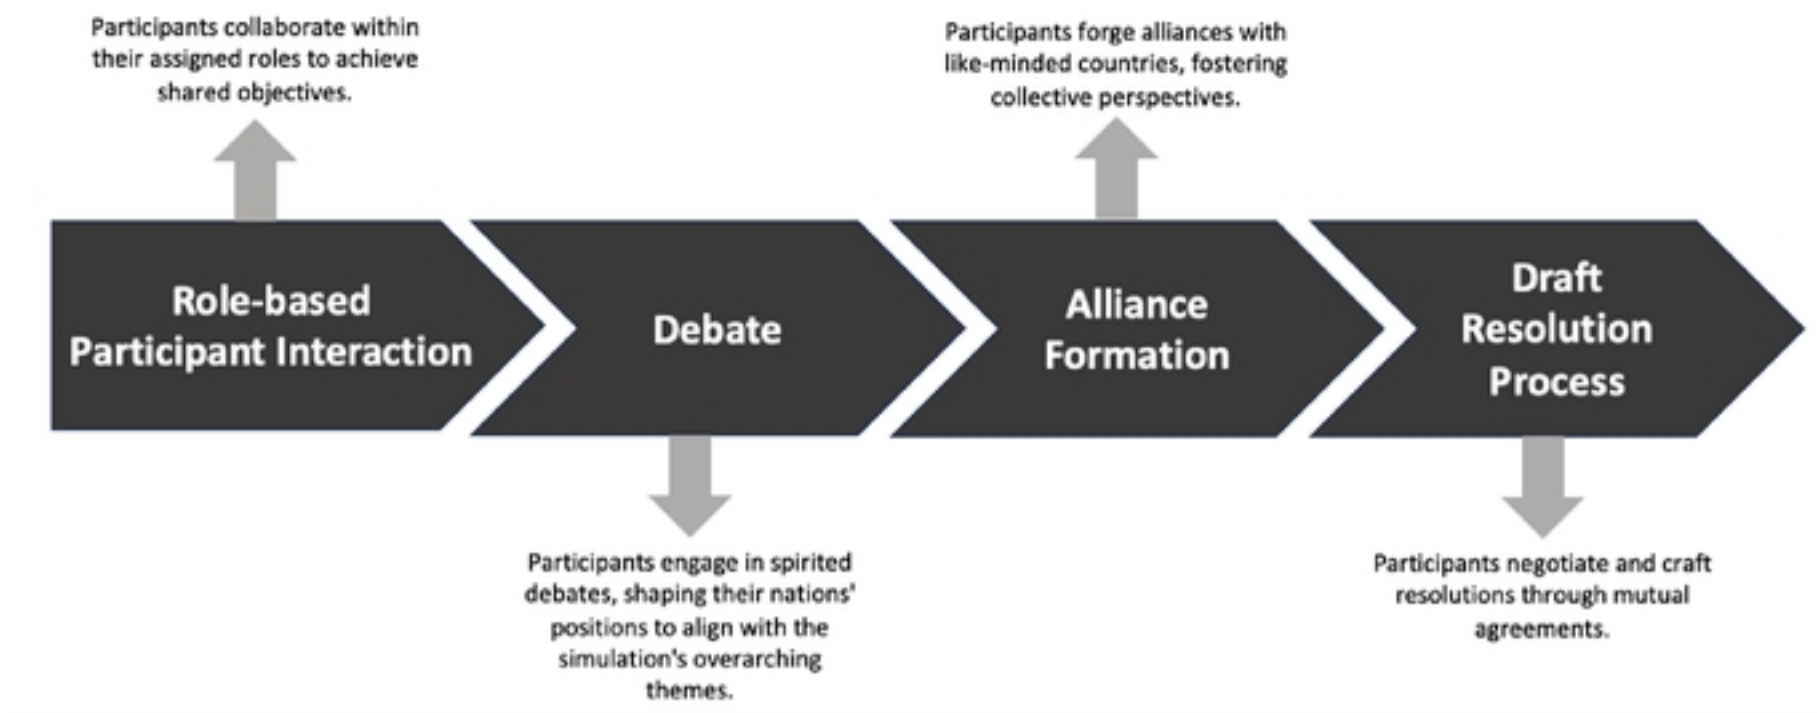

**Figure 1. The four components that make up a WHA Simulation**

medRxiv preprint doi: <https://doi.org/10.1101/2023.12.19.23300262>; this version posted December 22, 2023. The copyright holder for this preprint (which was not certified by peer review) is the author/funder, who has granted medRxiv a license to display the preprint in perpetuity.

It is made available under a [CC-BY 4.0 International license](https://creativecommons.org/licenses/by/4.0/) .
